# 1 **Parallel CRISPR-Cas9 screens clarify impacts** 2 **of p53 on screen performance**

3 **Anne Ramsay Bowden<sup>1\*</sup>, David A. Morales Juarez<sup>1\*</sup>, Matylda**  
4 **Sczaniecka-Clift<sup>1</sup>, Maria Martin Agudo<sup>1</sup>, Natalia Lukashchuk<sup>1,2</sup>, John**  
5 **C. Thomas<sup>1†</sup> and Stephen P. Jackson<sup>1†</sup>**

6 <sup>1</sup> Wellcome/Cancer Research UK Gurdon Institute, University of Cambridge,  
7 Cambridge, United Kingdom

8 <sup>2</sup> Present address: Oncology Research & Early Development, AstraZeneca,  
9 Cambridge, United Kingdom

10 \*These authors contributed equally to this work

11 †Corresponding authors: [j.thomas@gurdon.cam.ac.uk](mailto:j.thomas@gurdon.cam.ac.uk), [s.jackson@gurdon.cam.ac.uk](mailto:s.jackson@gurdon.cam.ac.uk)

12

## 13 **Abstract**

14 CRISPR-Cas9 genome engineering has revolutionised high-throughput functional  
15 genomic screens. However, recent work has raised concerns regarding the  
16 performance of CRISPR-Cas9 screens using *TP53* wild-type human cells due to a  
17 p53-mediated DNA damage response (DDR) limiting the efficiency of generating  
18 viable edited cells. To directly assess the impact of cellular p53 status on CRISPR-  
19 Cas9 screen performance, we carried out parallel CRISPR-Cas9 screens in wild-type  
20 and *TP53* knockout human retinal pigment epithelial cells using a focused dual guide  
21 RNA library targeting 852 DDR-associated genes. Our work demonstrates that  
22 although functional p53 status negatively affects identification of significantly depleted  
23 genes, optimal screen design can nevertheless enable robust screen performance.  
24 Through analysis of our own and published screen data, we highlight key factors for  
25 successful screens in both wild-type and p53-deficient cells.

26

## 27 Introduction

28 CRISPR-Cas9 genome engineering technologies have transformed cell biology,  
29 particularly high throughput functional genomic screens (Wang et al., 2015), (Shalem  
30 et al., 2014), (Shalem, Sanjana, & Zhang, 2015). Pooled CRISPR-Cas9 cell viability  
31 screens have been successfully employed in determining gene essentiality (Hart et  
32 al., 2015), identifying genetic interactions (Chan et al., 2019) and assessing drug  
33 sensitivities across various genetic backgrounds (Han et al., 2017). A number of  
34 factors influence CRISPR-Cas9 screen performance, including cellular background.  
35 In particular, recent reports concerning technical difficulties in CRISPR-Cas9 genome  
36 editing in p53-proficient cells, have brought into question the suitability of p53-  
37 proficient cell lines for high throughput CRISPR-Cas9 genetic screens (Haapaniemi,  
38 Botla, Persson, Schmierer, & Taipale, 2018), (Ihry et al., 2018).

39  
40 *TP53*, encoding p53, acts as a master regulator of cell-cycle checkpoint activation  
41 (Kastan, Onyekwere, Sidransky, Vogelstein, & Craig, 1991), cellular senescence  
42 (Shay, Pereira-Smith, & Wright, 1991) and induction of apoptosis in response to DNA  
43 damage (Clarke et al., 1993), (Lowe, Schmitt, Smith, Osborne, & Jacks, 1993), (Lakin  
44 & Jackson, 1999). *TP53* is arguably the most important tumour suppressor gene, with  
45 loss of function mutations in up to 50% of human cancers (Bouaoun et al., 2016).  
46 Consequently, the p53 status of a cell line, either wild-type (proficient) or mutant  
47 (deficient), can be an important factor in determining the suitability of a cellular model,  
48 and hence is an important consideration in design of high throughput genetic screens.

49  
50 Generation of DNA double strand breaks (DSBs) induces p53-dependent cell-cycle  
51 arrest in normal fibroblasts (Di Leonardo, Linke, Clarkin, & Wahl, 1994), and most

52 CRISPR-Cas9 genome editing approaches rely on DSB generation to achieve efficient  
53 editing (Jinek et al., 2012). Recent work has shown that CRISPR-Cas9-associated  
54 DSBs in hPSCs (human pluripotent stem cells) induce a p53-mediated apoptotic  
55 response, leading to high levels of toxicity and reduced editing efficiency in this  
56 background (Ihry et al., 2018). Furthermore, a similar p53-mediated DSB response in  
57 wild-type retinal pigment epithelial (RPE-1) cells reportedly severely impaired  
58 identification of essential genes in a CRISPR-Cas9 screen when compared to RPE-1  
59 *TP53* knockout (*TP53<sup>KO</sup>*) cells (Haapaniemi et al., 2018). In contrast, analysis of data  
60 from a small number of additional screens in p53 wild-type RPE-1 cells has shown  
61 that performance of successful CRISPR screens, as determined by essential gene  
62 identification and enrichment of expected targets, is possible in this cellular  
63 background (Brown, Mair, Soste, & Moffat, 2019). This controversy is confounded by  
64 the complexity of variation in experimental design between screens with a lack of  
65 controlled parallel experiments. To provide more definitive insights into this important  
66 debate, we performed parallel CRISPR-Cas9 screens in paired wild-type and *TP53<sup>KO</sup>*  
67 cell lines, thereby minimising additional confounding factors that can preclude  
68 accurate screen comparisons.

69  
70 We carried out parallel screens, in wild-type and *TP53<sup>KO</sup>* RPE-1 cells with two  
71 independent Cas9-expressing monoclonal populations for each genetic background,  
72 selected based on p53 status and high Cas9 cutting efficiency (**Supplementary**  
73 **Figure 1**). To facilitate high screen sensitivity and in-depth interrogation of p53-  
74 mediated responses to CRISPR-Cas9-associated DSBs, we designed a bespoke dual  
75 guide RNA library targeting 852 DDR-related genes, with 112 olfactory receptor genes  
76 included as non-essential gene controls and 14 sequence-scrambled negative  
77 controls (**Supplementary Table 1**). The smaller size of this library compared to a

78 whole genome library enabled high guide representation (>1000x) to be maintained  
79 throughout the screen, minimising the impact of this key factor on screen sensitivity  
80 (Miles, Garippa, & Poirier, 2016). In addition, our library incorporated a dual guide RNA  
81 vector design (Erard, Knott, & Hannon, 2017) to increase the frequency of functional  
82 knockout events in transduced cells compared to the canonical single guide RNA  
83 (sgRNA) approach. We reasoned that a vector generating two DSBs per cell may  
84 increase detection of differences in screen sensitivity due to variation in DSB  
85 responses between genetic backgrounds. Screens were executed as depicted in  
86 **Figure 1**, and relative enrichments and depletions of gene knockouts in the edited cell  
87 populations were determined from guide read counts generated by next-generation  
88 Illumina DNA sequencing (**Supplementary Table 2**) using the program MAGeCK (Li  
89 et al., 2014) (**Supplementary Table 3**).

90

**Figure 1**

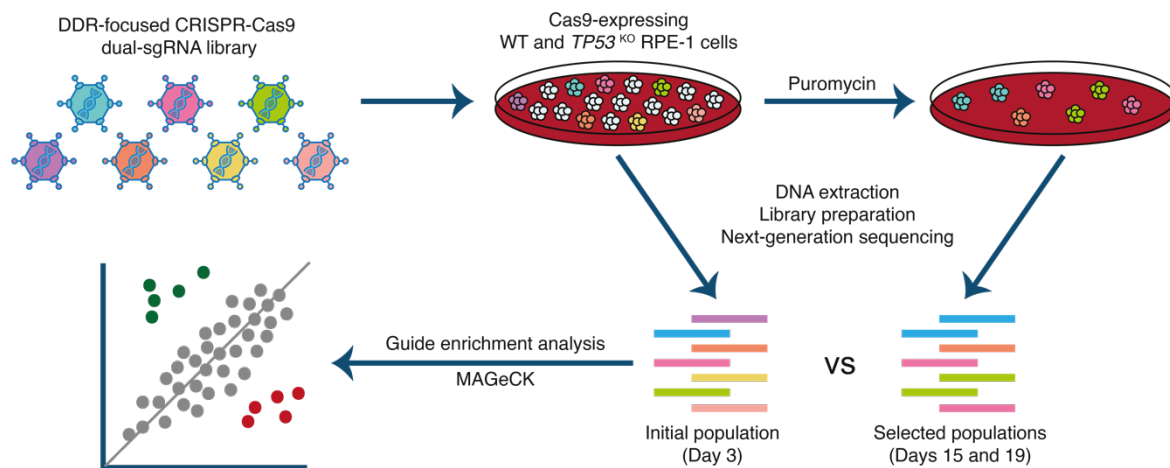

**Experimental set-up of parallel CRISPR-Cas9 screens in wild type (WT) and *TP53* knockout (*TP53*<sup>KO</sup>) RPE-1 cells.** Cells were infected at a low multiplicity of infection (MOI = 0.3). An initial sample was harvested 48 hours after infection, following which transduced cells were selected with puromycin, and harvested at days 15 and 19. Guide RNA (gRNA) representations were evaluated by extraction of genomic DNA from surviving cells, PCR amplification of vector barcodes, and next-generation sequencing. MAGeCK (Li et al., 2014) was used to determine the relative depletion and enrichment of genes in later samples compared to the 48 hour samples.

91

92 In our screens, depletion of core essential genes (as defined by Hart et al., 2017) was  
93 clearly evident in both wild-type and *TP53*<sup>KO</sup> backgrounds (**Figure 2A and**

94 **Supplementary Figure 2A**). Due to the conservative nature of this essential gene list,  
95 additional genes with significant depletions were also identified in both cell lines  
96 (**Supplementary Table 3**). A receiver operating characteristic (ROC) curve showing  
97 the classification of essential versus non-essential genes by gene depletion p-value  
98 ranks (calculated by MAGeCK) (**Figure 2B**) demonstrated good performance of both  
99 screens. Nevertheless, the *TP53<sup>KO</sup>* screen slightly outperformed the wild-type screen  
100 at both harvesting timepoints in terms of detection of essential genes by rank.

101

102 When the significance of gene depletions was considered, we found that essential  
103 genes were much more likely to have low adjusted p-values (q-values) in the *TP53<sup>KO</sup>*  
104 background, compared to wild-type. In addition, we observed that the day 19 timepoint  
105 outperformed the day 15 timepoint, detecting increased numbers of essential genes  
106 at a given significance threshold (**Figure 2C and Supplementary Figure 2B**). The  
107 underlying basis behind this differential sensitivity to identifying essential genes lies in  
108 the magnitude of the phenotypic effect observed for each guide. While log fold  
109 changes (LFCs) across non-core essential (“not essential”) genes were not  
110 significantly different between the two genetic backgrounds ( $p=0.60$ ), LFCs for core  
111 essential genes were significantly lower in the *TP53<sup>KO</sup>* screens compared to screens  
112 in *TP53* wild-type settings ( $p=0.0010$ ) (**Figure 2D**), consistent with wild-type cells  
113 initiating a p53-mediated response to Cas9-induced DSBs. This would inhibit the  
114 proliferation rates of all transduced cells during the course of the screens, leading to  
115 smaller LFCs and a narrower distribution of guides within the population, with a  
116 consequent reduction in genes with significant depletion scores. Similar results were  
117 seen in our analyses of day 15 samples (**Supplementary Figure 2C**).

**Figure 2**

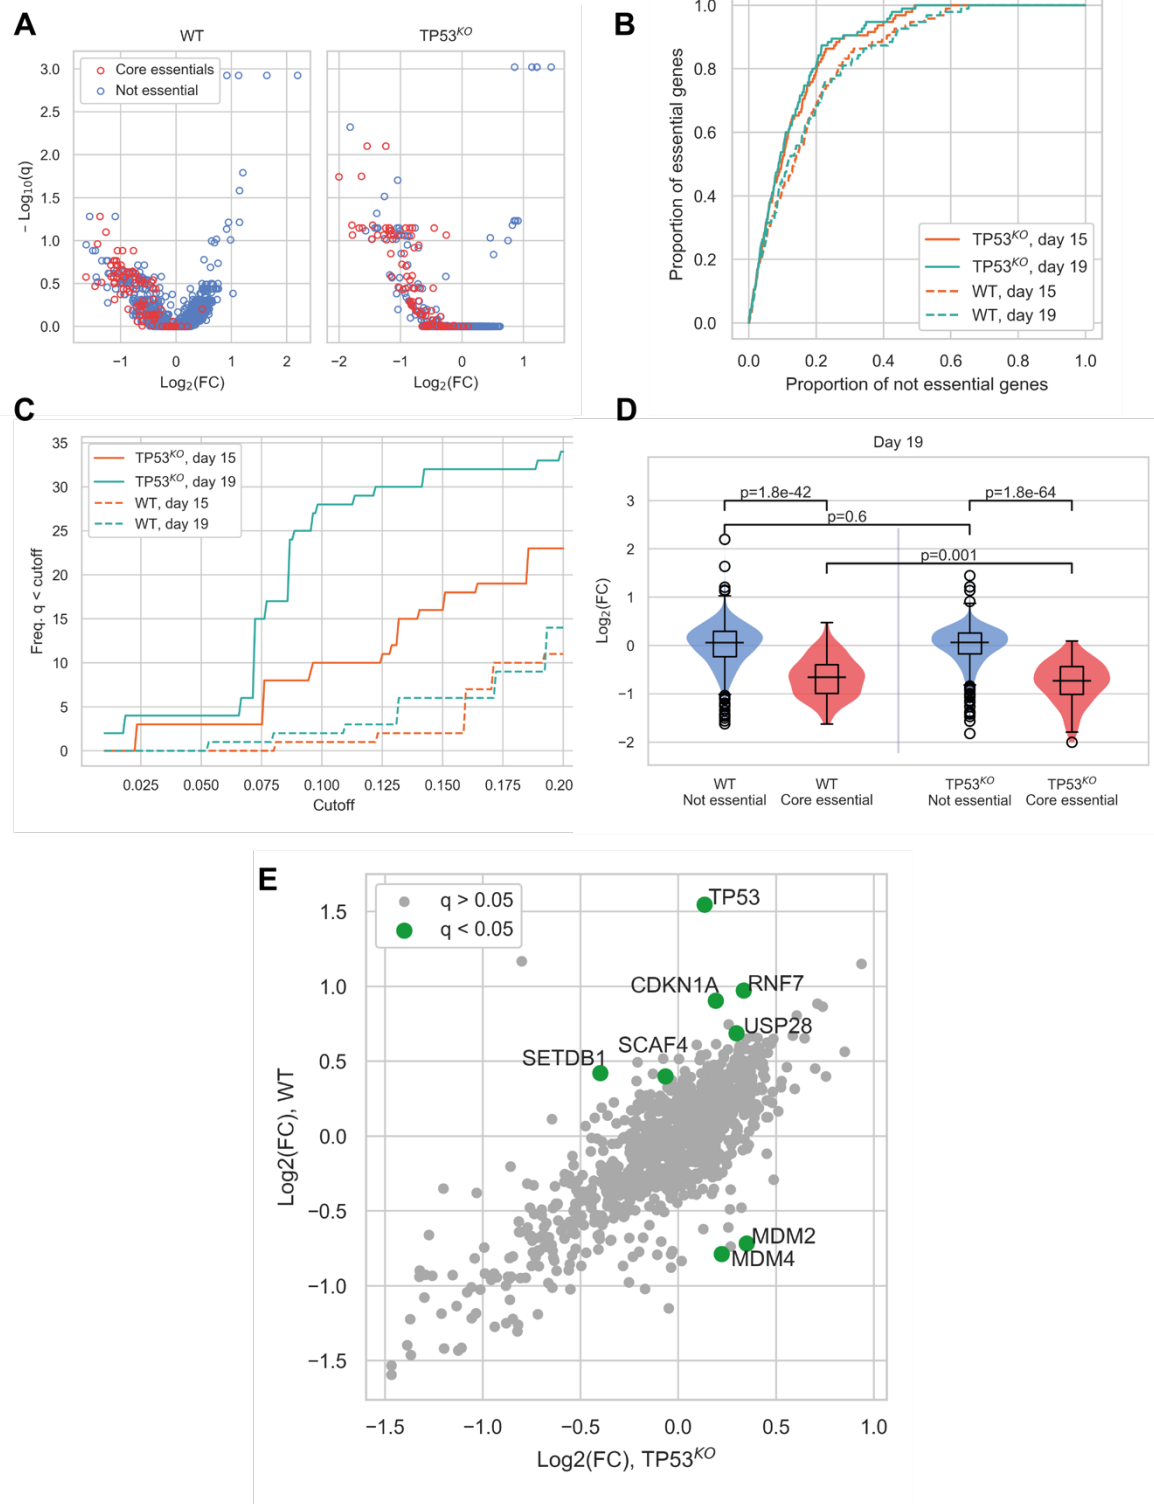

**Comparison of CRISPR-Cas9 screens in wild type and *TP53*<sup>KO</sup> cells demonstrates the impact of p53 on screen performance (A)** Mean  $\log_2$  fold change (LFC) in guide abundance per gene, and significance of this change, from day 3 to day 19 of the experiment.  $q$ -value is False Discovery Rate (FDR) given by MAGeCK. (B) Receiver operating characteristic curves of MAGeCK  $p$ -values, discriminating between genes classified as core essential by Hart et al (2017) and other genes. (C) Number of core essential genes with  $q$ -value less than the range of values given on the x-axis. (D) Mean LFC of guides targeting core essential and not core essential genes (Day 19 samples). Paired  $t$ -tests were used to test core essential or not essential genes between cell lines, unpaired  $t$ -tests were used within a cell line. (E) Mean LFC per gene in WT and TP53KO cell lines.  $q$ -values calculated by MAGeCK (Day 19 samples).

119 The impact of the p53-mediated response is also evident when comparing screen  
120 results from differential enrichment and depletion of genes between the two genetic  
121 backgrounds (**Figure 2E**). As expected, in *TP53* wild-type cells, guides targeting *TP53*  
122 were the most significantly enriched, with guides targeting other components of the  
123 p53 pathway showing the most significant differences between the two genetic  
124 backgrounds. Guides significantly enriched in the *TP53* wild-type background included  
125 those targeting *CDKN1A* that encodes p21, the major downstream mediator of p53-  
126 mediated cell cycle arrest (El-Deiry, 1993), and those targeting *USP28* that encodes  
127 a deubiquitylating enzyme that acts to stabilise p53 (Zhang, Zaugg, Mak, & Elledge,  
128 2006), (Cuella-Martin et al., 2016). In contrast, guides targeting genes that were  
129 significantly depleted in the wild-type but not the *TP53* knockout background included  
130 *MDM2* and *MDM4*, which act as negative regulators of p53. MDM2 is an E3 ubiquitin  
131 ligase that targets p53 for degradation (Haupt, Maya, Kazaz, & Oren, 1997), while  
132 MDM4 inhibits p53-dependent transcriptional activity (Francoz et al., 2006). *SETDB1*,  
133 which acts via MDM2, was also enriched in the *TP53* wild-type background. This  
134 protein forms a complex with p53 and catalyses p53 K370 di-methylation. Attenuation  
135 of SETDB1 reduces the level of di-methylation at this site, leading to increased  
136 recognition and degradation of p53 by MDM2 (Fei et al., 2015). Furthermore, when  
137 we assessed the enrichment/depletion of specific biological pathways between the  
138 wild-type and *TP53*<sup>KO</sup> backgrounds, cell cycle and p53 signalling were the two  
139 pathways that were enriched (**Supplementary Figure 3 and Supplementary Table**  
140 **4**). Together, these results demonstrated that despite reduced screen sensitivity in  
141 p53-proficient cells, biologically meaningful enrichment and depletion analyses at the  
142 individual gene and pathway levels can still be performed in *TP53* wild-type settings.  
143

144 To further contextualise the feasibility of performing CRISPR-Cas9 screens in a p53-  
145 proficient background, we analysed our screens with five others performed in *TP53*  
146 wild-type RPE-1 cells. When we performed a comparative ROC curve analysis to  
147 assess the screens' abilities to discriminate between core essential genes and other  
148 genes (**Figure 3A**), this established that the performance of all screens was similar,  
149 with the exception of Haapaniemi *et al.* 2018 data which underperformed in the ability  
150 to distinguish essential genes. We then examined the distribution of normalised LFCs  
151 for each screen (**Figure 3B**). This revealed that the core essential genes formed  
152 distributions distinct from those of olfactory receptors and other non-essential genes  
153 in all wild-type screens, with the exception of the Haapaniemi *et al.* screen where the  
154 separation was minimal (the smaller median LFC in our screen compared to the other  
155 four successful screens did not notably hinder our ability to distinguish essential  
156 genes). Taken together, these analyses provide further evidence that CRISPR-Cas9  
157 screens can be performed successfully in a p53-proficient background. It appears that  
158 the Haapaniemi *et al.* screen is an outlier in its inability to robustly detect essential  
159 genes, possibly due to differences in experimental design and execution, and perhaps  
160 reflecting relatively low editing efficiency of the single wild-type RPE-1 clone used in  
161 this screen. This factor strengthens the importance of carefully selecting clones with  
162 high Cas9 editing efficiency and also for the use of biological replicates, to enable  
163 recognition of common screen results that are independent of clonal background.



**Figure 3**

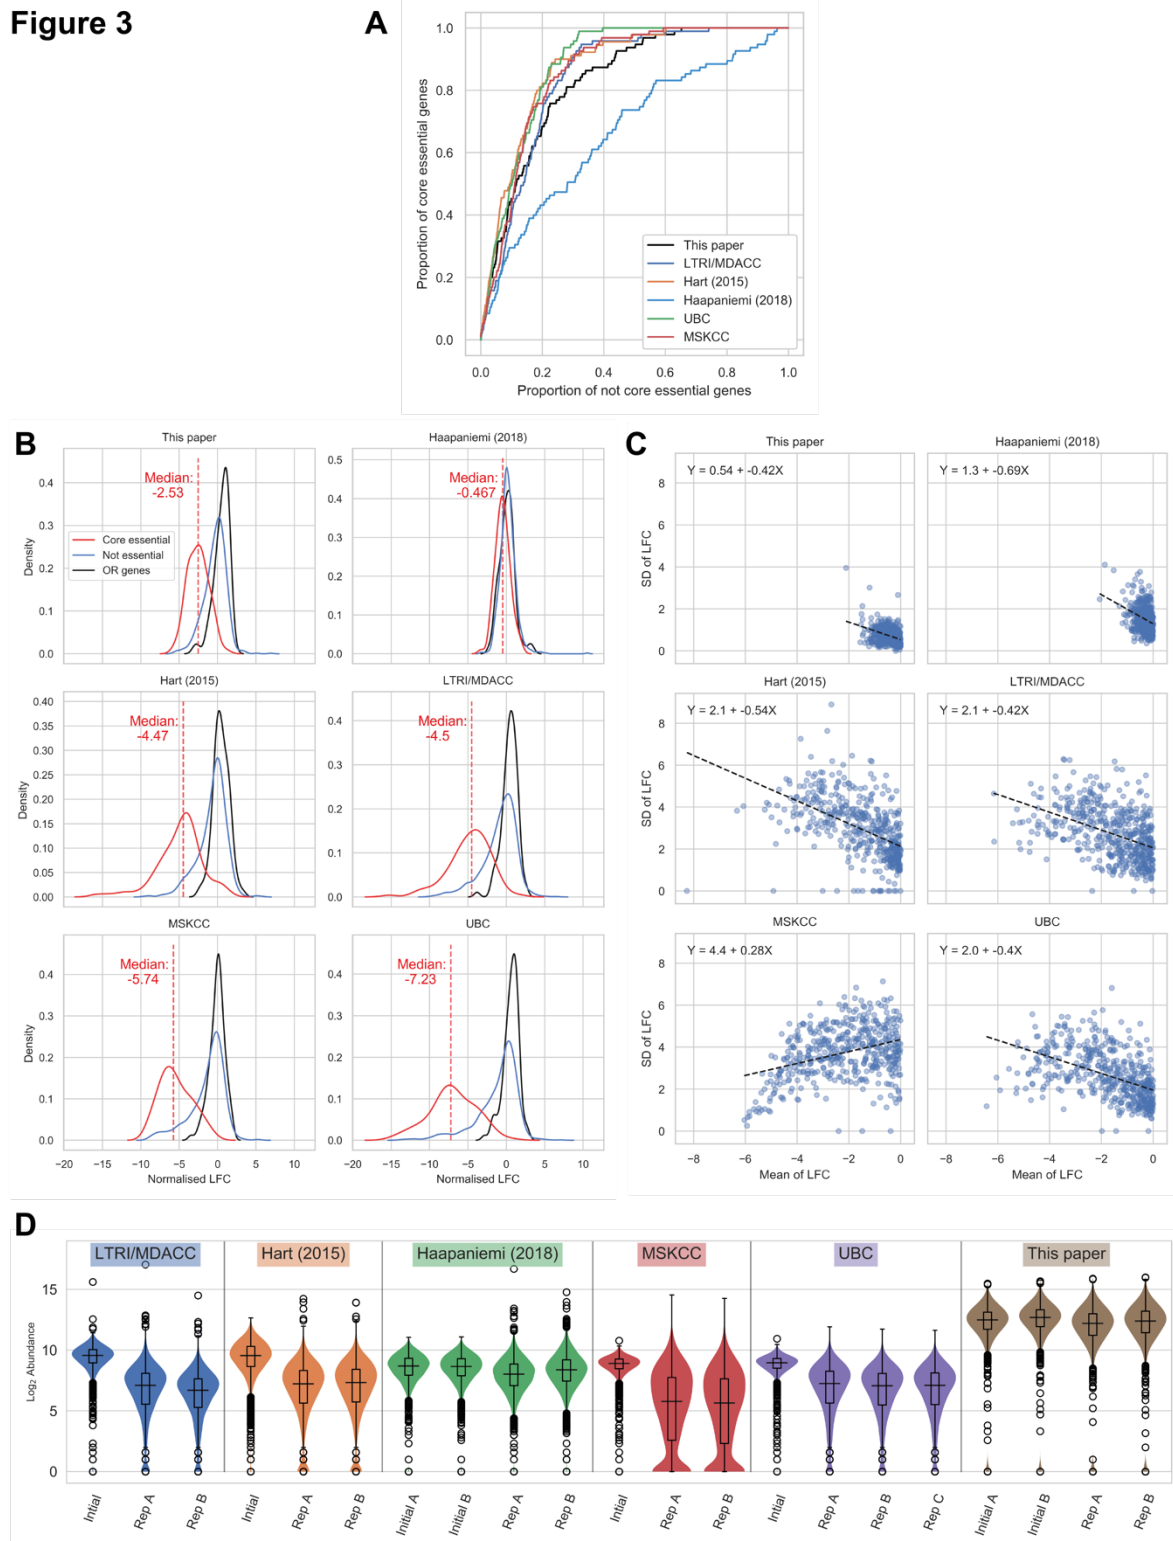

**Comparison of wild-type RPE-1 CRISPR-Cas9 screens highlights important factors in screen design.**

(A) Receiver operating characteristic of MAGECK p-values, from different screens, discriminating core essential genes and other genes in *TP53* WT cells. (B) Distribution of normalised LFCs. The solid lines give kernel density estimates for each distribution, and the dashed line shows the median LFC of the core essential genes. (C) Mean LFC versus standard deviation (SD) per gene for genes with mean LFC < 0. As the SD is expected to scale with mean LFC, and the LFC distributions vary between experiments, ordinary least squares regressions were performed to determine the size of the variance across the range of LFCs. The dashed line shows the line of best fit and the equation for each line is given in the chart. (D)  $\text{Log}_2$  guide abundance across all screens. Box plots give median and quartile values.

165 We noted that while the median LFC is higher in the LTRI/MDACC, Hart, UBC and  
166 MSKCC screens, the variance is also increased when compared to ours.  
167 Consequently, we interrogated the relationship between the standard deviation (SD)  
168 of the LFCs and the mean LFC values for each of the wild-type screens. **Figure 3C**  
169 shows that the variance in LFC between guides targeting the same gene is less in our  
170 screen than in these other screens. We speculate that this decrease in variance is  
171 linked to the much higher gRNA representation kept throughout our screen (>1000x  
172 mean gRNA representation) than in these other screens, although we cannot discard  
173 the possibility that the dual-sgRNA system we used is the cause of this effect. High  
174 gRNA representation is relevant for the success and reliability of CRISPR-Cas9  
175 screens, with most published recommendations suggesting screening to at least 200x  
176 gRNA representation (Aregger, Chandrashekar, Tong, Chan, & Moffat, 2019) but  
177 ideally >500x (Joung et al., 2017). Importantly, high representation must be  
178 maintained throughout cell culture and also in the PCR amplification steps. Sufficient  
179 sequencing depth is also essential to maintain the sensitivity achieved through high  
180 gRNA representation. **Figure 3D** demonstrates the variability in guide abundance  
181 determined by sequencing reads across the screens analysed. The MSKCC screen is  
182 the only dataset to show a distribution with a substantial number of zero reads in the  
183 final samples, which accounts for the decreased variance at more negative LFCs in  
184 this screen (**Supplementary Figure 4**). Through modelling the effect of decreased  
185 sequencing depth in our data, we demonstrate that low read counts can notably  
186 decrease screen sensitivity (**Supplementary Figure 5**).

## 187 Conclusions

188 In summary, we present data from parallel screens in *TP53* wild-type and *TP53*<sup>KO</sup>  
189 RPE-1 cells, which demonstrate that a p53-mediated response does negatively impact  
190 the sensitivity of CRISPR-Cas9 screens. Other important factors impacting sensitivity  
191 include the guide RNA library used, the magnitude of guide effects, adequate gRNA  
192 representation and sufficient sequencing depth. Selection of high-editing efficiency  
193 Cas9-expressing cells is also important and use of biological replicates enables  
194 identification of clonal variation. Considering these factors in screen design and  
195 execution allows successful CRISPR-Cas9 screens to be carried out in both p53-  
196 proficient and p53-deficient cells, thereby fostering new biological insights.

197

## 198 Materials and Methods

### 199 **Dual-sgRNA library design**

200 A custom dual-sgRNA library was designed to target 852 genes related to the DNA  
201 damage response, 112 olfactory-receptor genes, and 14 sequence scrambled  
202 negative controls with a total of 3,404 dual-sgRNAs. The sgRNA sequences and  
203 pairwise scores were determined using the Croatan scoring algorithm (Erard et al.,  
204 2017). Transomic Technologies selected the top pairs of sgRNAs for each gene and  
205 assigned a distinct barcode to each pair, cloned them into the pCLIP-*dual*-SFFV-  
206 ZsGreen vector, and packaged them into lentiviral particles ready for transduction. For  
207 pooled screening, the viral titre was determined by exposing cells to a 6-point dose  
208 response of the lentiviral stock. The optimal concentration of virus to achieve a  
209 multiplicity of infection (MOI) of 0.3 was determined by linear regression analysis.

210

## 211 **CRISPR-Cas9 screens**

212 CRISPR-Cas9 screens were performed using the custom dual-sgRNA DNA damage  
213 response library outlined above. Biological duplicates (two independently isolated  
214 Cas9-expressing clones) of wild-type and *TP53<sup>KO</sup>* RPE-1 cells were transduced at a  
215 MOI of 0.3 and >1,000-fold coverage of the library. The following day, cells were  
216 cultured with puromycin to select for the transductants for 12 additional days. Surviving  
217 cells from each biological replicate were harvested prior to puromycin selection (day  
218 3), and at day 15 and day 19 after initial transduction. Subsequently, the genomic DNA  
219 (gDNA) was isolated using TAIL buffer (17mM Tris pH 7.5, 17mM EDTA, 170mM  
220 NaCl, 0.85% SDS, and 1mg/mL Proteinase K) and subjected to 24 PCR reactions with  
221 custom indexed primers designed to amplify the barcode within the lentiviral backbone  
222 and append Illumina adapter sequences. Finally, the PCR products were purified  
223 (QIAquick PCR Purification kit, Qiagen), multiplexed, and sequenced on an Illumina  
224 HiSeq1500 system. Genes enriched or depleted in the day 15 and day 19 samples  
225 compared to the day 3 samples were determined using MAGeCK v0.5.9.2 (Li et al.,  
226 2014).

227

## 228 **Cell culture**

229 RPE-1 *TP53* wild-type and *TP53<sup>KO</sup>* cells were cultured in DMEM/F-12 media  
230 (Dulbecco's Modified Eagle Medium: Nutrient Mixture Ham's F-12, Sigma-Aldrich)  
231 supplemented with 7.5% NaHCO<sub>3</sub> (Sigma-Aldrich), 10% (v/v) foetal bovine serum  
232 (FBS, BioSera), 100 U/mL penicillin, 100 µg/mL streptomycin (Sigma-Aldrich), 2mM  
233 L-glutamine, and 10 µg/mL blasticidin (Sigma-Aldrich) to select for Cas9 expressing  
234 cells. Cells were additionally cultured with 1.5 µg/mL puromycin during selection of the  
235 transductants.

236

## 237 **Western Blot**

238 RPE-1 *TP53* wild-type and *TP53*<sup>KO</sup> cells were harvested in 100-200uL of Laemmli  
239 buffer (120mM Tris 6.8pH, 4%SDS, 20% glycerol). Protein concentrations were  
240 determined using a NanoDrop spectrophotometer (Thermo Scientific) at A280 nm.  
241 SDS-PAGE was performed with 35µg of protein lysates, the proteins were resolved  
242 on a precast NuPAGE Novex 4–12% Bis/Tris gradient gel (Invitrogen). Resolved  
243 proteins were transferred to a nitrocellulose membrane (GE Healthcare) and  
244 immunoblotted with the following antibodies at a 1/1,000 dilution: p53 (#554293, BD  
245 Biosciences) and GAPDH (#MAB374, Merck Millipore).

246

## 247 **Human cell line generation**

248 RPE-1 *TP53* wild-type cells were obtained from Professor Jonathon Pines and utilised  
249 for generation of the RPE-1 *TP53*<sup>KO</sup> cells as described previously (Chiang, le Sage,  
250 Larrieu, Demir, & Jackson, 2016). The *TP53* wild-type and *TP53*<sup>KO</sup> RPE-1 cells were  
251 transduced with a lentiviral vector encoding Cas9 and a blasticidin resistance cassette  
252 to facilitate the isolation of Cas9-expressing clones. Limiting dilution of the transduced  
253 population enabled isolation of monoclonal cell lines. Cas9 expression was validated  
254 by western blot and Cas9 editing efficiency was assayed by transducing clones with a  
255 lentiviral vector encoding GFP, BFP, and a sgRNA for GFP (obtained from Dr  
256 Emmanouil Metzakopian, UK Dementia Research Institute, Cambridge, UK).  
257 Transduced and non-transduced cells were subjected to FACS sorting using an  
258 LSRFortessa (BD Biosciences) flow cytometer. The Cas9 editing efficiency for each  
259 clone was calculated by comparing the percentage of BFP<sup>+</sup> (i.e. edited) cells to the  
260 GFP/BFP<sup>+</sup> cells (i.e. total transduced population) using FlowJo.

261

## 262 **Statistical software used**

263 Statistical analyses were performed in Python (3.7.5), using the following packages in  
264 particular:

- 265 • MAGeCK (0.5.9.2)
- 266 • jupyterlab (1.1.4)
- 267 • matplotlib (3.1.1)
- 268 • seaborn (0.9.0)
- 269 • pandas (0.25.0)
- 270 • numpy (1.16.4)
- 271 • scipy (for t-tests & Fisher's exact test, 1.3.0)
- 272 • scikit-learn (for PCA, 0.21.2)
- 273 • statsmodels (for linear regression and multiple testing correction, 0.10.1)

274

## 275 **CRISPR screen re-analyses**

276 Data files containing guide abundances were downloaded from

277 <https://www.ncbi.nlm.nih.gov/geo/query/acc.cgi?acc=GSE128210>.

278 See **Supplementary Table 5** for full details of data used. Where multiple timepoints  
279 were available, the day 18 timepoint was used. Guides targeting genes not present in  
280 our DDR library were removed from the abundance tables, and MAGeCK (0.5.9.2)  
281 was used to obtain significance values for depletion and enrichment of genes. The  
282 command line arguments “remove-zero-threshold=10” and “remove-zero=control”  
283 were used.

284 **LFC normalisation**

285 LFCs were normalised by subtracting the mean of the olfactory receptor (OR) genes  
286 from all values, and then dividing all values by the SD of the OR genes.

287

288 **Resampling**

289 To simulate smaller sequencing runs, guide abundances were resampled by N  
290 random draws using the initial abundances as weights. N was set to yield expected  
291 median abundances ranging between 10 and 1000. MAGeCK was used to obtain  
292 significance values as above. 5 replicate draws were performed per sample.

293

294 **Pathway analysis**

295 Genes within the library were annotated according to KEGG (Kyoto Encyclopedia of  
296 Genes and Genomes) pathway. Selection of relevant pathways within the library was  
297 based on classifications by Pearl *et al.* (L. H. Pearl, Schierz, Ward, Al-Lazikani, &  
298 Pearl, 2015). The enrichment of genes with  $p < 0.05$  in these pathways was evaluated  
299 using Fisher's exact test. Genes that were depleted over time, or enriched, were tested  
300 separately.

301

302

## 303 Acknowledgements

304 We thank all Steve Jackson lab members for support and advice, particularly K. Dry  
305 who provided editorial assistance with the manuscript. The GFP-BFP-sgRNA vector  
306 used for determining Cas9-editing efficiency was provided by Dr Emmanouil  
307 Metzakopian (UK Dementia Research Institute, Cambridge, UK).

308 Research in the S.P.J. laboratory is funded by Cancer Research UK (programme grant  
309 C6/A18796) and Wellcome Investigator Award (206388/Z/17/Z). Institute core  
310 infrastructure funding is provided by Cancer Research UK (C6946/A24843) and  
311 Wellcome (WT203144). S.P.J. receives salary from the University of Cambridge. This  
312 work was funded by Cancer Research UK programme grants C6/A18796 and  
313 C6/A11224 (M.S-C. and N.L., respectively), Wellcome Investigator Award  
314 206388/Z/17/Z (J.T and M.M.A). A.R.B. is funded by a Wellcome Clinical Fellowship.  
315 D.M.J. is funded by a CONACYT-Cambridge scholarship.

316

## 317 Competing Interests

318 The authors declare no competing interests relevant to the work described in this  
319 paper.

320



## 321 References

- 322 Aregger, M., Chandrashekar, M., Tong, A. H. Y., Chan, K., & Moffat, J. (2019).  
323 Pooled Lentiviral CRISPR-Cas9 Screens for Functional Genomics in Mammalian  
324 Cells. *Methods in Molecular Biology (Clifton, N.J.)*, 1869(1), 169–188.  
325 [http://doi.org/10.1007/978-1-4939-8805-1\\_15](http://doi.org/10.1007/978-1-4939-8805-1_15)
- 326 Bouaoun, L., Sonkin, D., Ardin, M., Hollstein, M., Byrnes, G., Zavadil, J., & Olivier, M.  
327 (2016). TP53 Variations in Human Cancers: New Lessons from the IARC TP53  
328 Database and Genomics Data. *Human Mutation*, 37(9), 865–876.  
329 <http://doi.org/10.1002/humu.23035>
- 330 Brown, K. R., Mair, B., Soste, M., & Moffat, J. (2019). CRISPR screens are feasible in  
331 TP53 wild-type cells. *Molecular Systems Biology*, 15(8), e71.  
332 <http://doi.org/10.15252/msb.20188679>
- 333 Chan, E. M., Shibue, T., McFarland, J. M., Gaeta, B., Ghandi, M., Dumont, N., et al.  
334 (2019). WRN helicase is a synthetic lethal target in microsatellite unstable cancers.  
335 *Nature*, 568(7753), 551–556. <http://doi.org/10.1038/s41586-019-1102-x>
- 336 Chiang, T.-W. W., le Sage, C., Larrieu, D., Demir, M., & Jackson, S. P. (2016).  
337 CRISPR-Cas9(D10A) nickase-based genotypic and phenotypic screening to  
338 enhance genome editing. *Scientific Reports*, 6, 24356.  
339 <http://doi.org/10.1038/srep24356>
- 340 Clarke, A. R., Purdie, C. A., Harrison, D. J., Morris, R. G., Bird, C. C., Hooper, M. L.,  
341 & Wyllie, A. H. (1993). Thymocyte apoptosis induced by p53-dependent and  
342 independent pathways. *Nature*, 362(6423), 849–852.  
343 <http://doi.org/10.1038/362849a0>
- 344 Cuella-Martin, R., Oliveira, C., Lockstone, H. E., Snellenberg, S., Grolmusova, N., &  
345 Chapman, J. R. (2016). 53BP1 Integrates DNA Repair and p53-Dependent Cell  
346 Fate Decisions via Distinct Mechanisms. *Molecular Cell*, 64(1), 51–64.  
347 <http://doi.org/10.1016/j.molcel.2016.08.002>
- 348 Di Leonardo, A., Linke, S. P., Clarkin, K., & Wahl, G. M. (1994). DNA damage triggers  
349 a prolonged p53-dependent G1 arrest and long-term induction of Cip1 in normal  
350 human fibroblasts. *Genes & Development*, 8(21), 2540–2551.  
351 <http://doi.org/10.1101/gad.8.21.2540>
- 352 El-Deiry, W. (1993). WAF1, a potential mediator of p53 tumor suppression. *Cell*, 75(4),  
353 817–825. [http://doi.org/10.1016/0092-8674\(93\)90500-P](http://doi.org/10.1016/0092-8674(93)90500-P)
- 354 Erard, N., Knott, S. R. V., & Hannon, G. J. (2017). A CRISPR Resource for Individual,  
355 Combinatorial, or Multiplexed Gene Knockout. *Molecular Cell*, 67(2), 348–354.e4.  
356 <http://doi.org/10.1016/j.molcel.2017.06.030>
- 357 Fei, Q., Shang, K., Zhang, J., Chuai, S., Kong, D., Zhou, T., et al. (2015). Histone  
358 methyltransferase SETDB1 regulates liver cancer cell growth through methylation  
359 of p53. *Nature Communications*, 6(1), 8651–12.  
360 <http://doi.org/10.1038/ncomms9651>
- 361 Francoz, S., Froment, P., Bogaerts, S., De Clercq, S., Maetens, M., Doumont, G., et  
362 al. (2006). Mdm4 and Mdm2 cooperate to inhibit p53 activity in proliferating and  
363 quiescent cells in vivo. *Proceedings of the National Academy of Sciences*, 103(9),  
364 3232–3237. <http://doi.org/10.1073/pnas.0508476103>
- 365 Haapaniemi, E., Botla, S., Persson, J., Schmierer, B., & Taipale, J. (2018). CRISPR-  
366 Cas9 genome editing induces a p53-mediated DNA damage response. *Nature*  
367 *Medicine*, 24(7), 927–930. <http://doi.org/10.1038/s41591-018-0049-z>
- 368 Han, K., Jeng, E. E., Hess, G. T., Morgens, D. W., Li, A., & Bassik, M. C. (2017).  
369 Synergistic drug combinations for cancer identified in a CRISPR screen for

- 370 pairwise genetic interactions. *Nature Biotechnology*, 35(5), 463–474.  
371 <http://doi.org/10.1038/nbt.3834>
- 372 Hart, T., Chandrashekhar, M., Aregger, M., Steinhart, Z., Brown, K. R., MacLeod, G.,  
373 et al. (2015). High-Resolution CRISPR Screens Reveal Fitness Genes and  
374 Genotype-Specific Cancer Liabilities. *Cell*, 163(6), 1515–1526.  
375 <http://doi.org/10.1016/j.cell.2015.11.015>
- 376 Hart, T., Tong, A. H. Y., Chan, K., Van Leeuwen, J., Seetharaman, A., Aregger, M., et  
377 al. (2017). Evaluation and Design of Genome-Wide CRISPR/SpCas9 Knockout  
378 Screens. *G3: Genes|Genomes|Genetics*, 7(8), 2719–2727.  
379 <http://doi.org/10.1534/g3.117.041277>
- 380 Haupt, Y., Maya, R., Kazaz, A., & Oren, M. (1997). Mdm2 promotes the rapid  
381 degradation of p53. *Nature*, 387(6630), 296–299. <http://doi.org/10.1038/387296a0>
- 382 Ihry, R. J., Worringer, K. A., Salick, M. R., Frias, E., Ho, D., Theriault, K., et al. (2018).  
383 p53 inhibits CRISPR-Cas9 engineering in human pluripotent stem cells. *Nature*  
384 *Medicine*, 24(7), 939–946. <http://doi.org/10.1038/s41591-018-0050-6>
- 385 Jinek, M., Chylinski, K., Fonfara, I., Hauer, M., Doudna, J. A., & Charpentier, E. (2012).  
386 A programmable dual-RNA-guided DNA endonuclease in adaptive bacterial  
387 immunity. *Science (New York, N.Y.)*, 337(6096), 816–821.  
388 <http://doi.org/10.1126/science.1225829>
- 389 Jung, J., Konermann, S., Gootenberg, J. S., Abudayyeh, O. O., Platt, R. J., Brigham,  
390 M. D., et al. (2017). Genome-scale CRISPR-Cas9 knockout and transcriptional  
391 activation screening. *Nature Protocols*, 12(4), 828–863.  
392 <http://doi.org/10.1038/nprot.2017.016>
- 393 Kastan, M. B., Onyekwere, O., Sidransky, D., Vogelstein, B., & Craig, R. W. (1991).  
394 Participation of p53 protein in the cellular response to DNA damage. *Cancer*  
395 *Research*, 51(23 Pt 1), 6304–6311.
- 396 Lakin, N. D., & Jackson, S. P. (1999). Regulation of p53 in response to DNA damage.  
397 *Oncogene*, 18(53), 7644–7655. <http://doi.org/10.1038/sj.onc.1203015>
- 398 Li, W., Xu, H., Xiao, T., Cong, L., Love, M. I., Zhang, F., et al. (2014). MAGeCK enables  
399 robust identification of essential genes from genome-scale CRISPR/Cas9  
400 knockout screens. *Genome Biology*, 15(12), 554.  
401 <http://doi.org/10.1186/PREACCEPT-1316450832143458>
- 402 Lowe, S. W., Schmitt, E. M., Smith, S. W., Osborne, B. A., & Jacks, T. (1993). p53 is  
403 required for radiation-induced apoptosis in mouse thymocytes. *Nature*, 362(6423),  
404 847–849. <http://doi.org/10.1038/362847a0>
- 405 Miles, L. A., Garippa, R. J., & Poirier, J. T. (2016). Design, execution, and analysis of  
406 pooled in vitro CRISPR/Cas9 screens. *The FEBS Journal*, 283(17), 3170–3180.  
407 <http://doi.org/10.1111/febs.13770>
- 408 Pearl, L. H., Schierz, A. C., Ward, S. E., Al-Lazikani, B., & Pearl, F. M. G. (2015).  
409 Therapeutic opportunities within the DNA damage response. *Nature Reviews.*  
410 *Cancer*, 15(3), 166–180. <http://doi.org/10.1038/nrc3891>
- 411 Shalem, O., Sanjana, N. E., & Zhang, F. (2015). High-throughput functional genomics  
412 using CRISPR-Cas9. *Nature Reviews. Genetics*, 16(5), 299–311.  
413 <http://doi.org/10.1038/nrg3899>
- 414 Shalem, O., Sanjana, N. E., Hartenian, E., Shi, X., Scott, D. A., Mikkelsen, T., et al.  
415 (2014). Genome-scale CRISPR-Cas9 knockout screening in human cells. *Science*  
416 *(New York, N.Y.)*, 343(6166), 84–87. <http://doi.org/10.1126/science.1247005>
- 417 Shay, J. W., Pereira-Smith, O. M., & Wright, W. E. (1991). A role for both RB and p53  
418 in the regulation of human cellular senescence. *Experimental Cell Research*,  
419 196(1), 33–39. [http://doi.org/10.1016/0014-4827\(91\)90453-2](http://doi.org/10.1016/0014-4827(91)90453-2)

- 420 Smith, I., Greenside, P. G., Natoli, T., Lahr, D. L., Wadden, D., Tirosh, I., et al. (2017).  
421 Evaluation of RNAi and CRISPR technologies by large-scale gene expression  
422 profiling in the Connectivity Map. *PLoS Biology*, 15(11), e2003213.  
423 <http://doi.org/10.1371/journal.pbio.2003213>
- 424 Wang, T., Birsoy, K., Hughes, N. W., Krupczak, K. M., Post, Y., Wei, J. J., et al. (2015).  
425 Identification and characterization of essential genes in the human genome.  
426 *Science (New York, N.Y.)*, 350(6264), 1096–1101.  
427 <http://doi.org/10.1126/science.aac7041>
- 428 Zhang, D., Zaugg, K., Mak, T. W., & Elledge, S. J. (2006). A role for the  
429 deubiquitinating enzyme USP28 in control of the DNA-damage response. *Cell*,  
430 126(3), 529–542. <http://doi.org/10.1016/j.cell.2006.06.039>  
431

### Supplementary Figure 1A

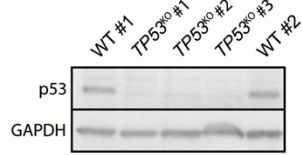

### Supplementary Figure 1B

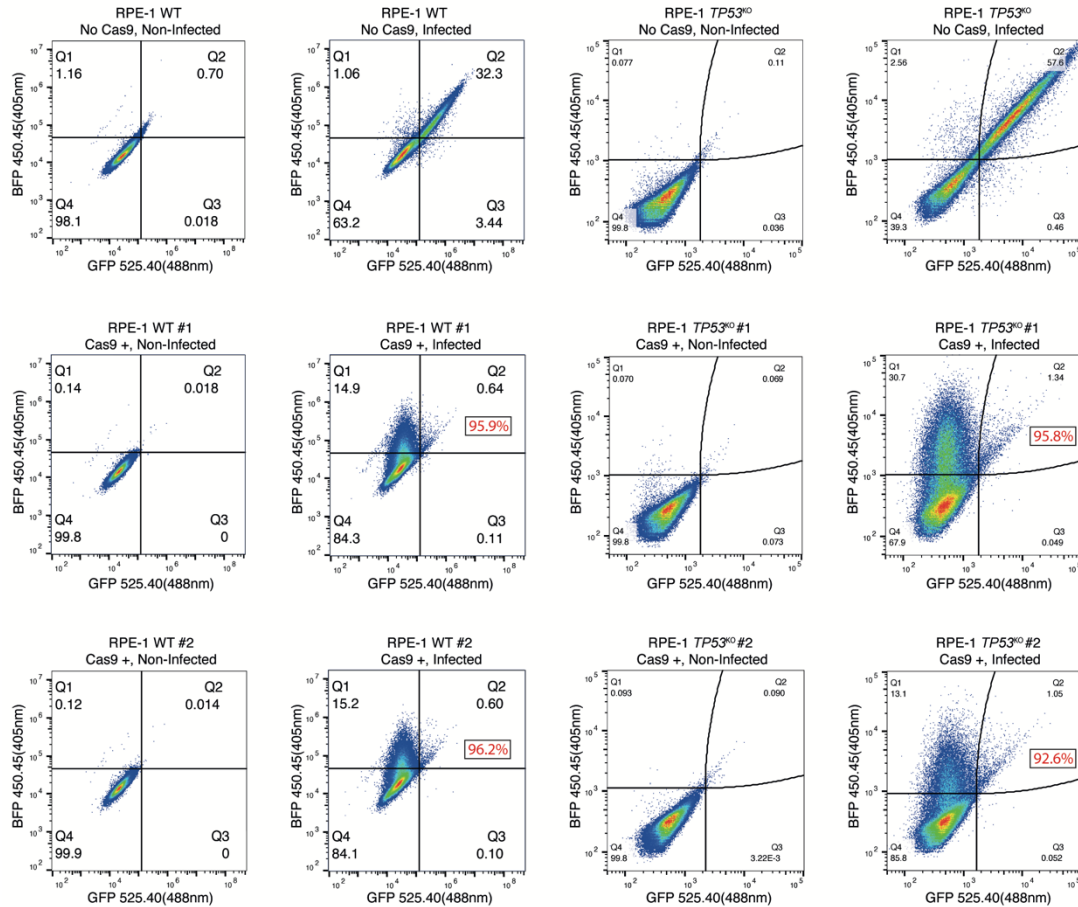

#### Validation of RPE-1 clones used in the screens.

(A) Western blot of p53 and GAPDH with the RPE-1 wild-type and TP53<sup>KO</sup> clones used in the screens. (B) Cas9 editing efficiency assayed by FACS. Non-infected samples were used for gating purposes. Cells with no Cas9 expression were used as negative controls. Editing efficiency of Cas9-expressing clones was calculated by comparing the percentage of BFP + (i.e. edited) cells to the GFP/BFP + cells (i.e. total transduced population) using FlowJo. Editing efficiencies of Cas9-expressing clones are displayed in red.

## Supplementary Figure 2

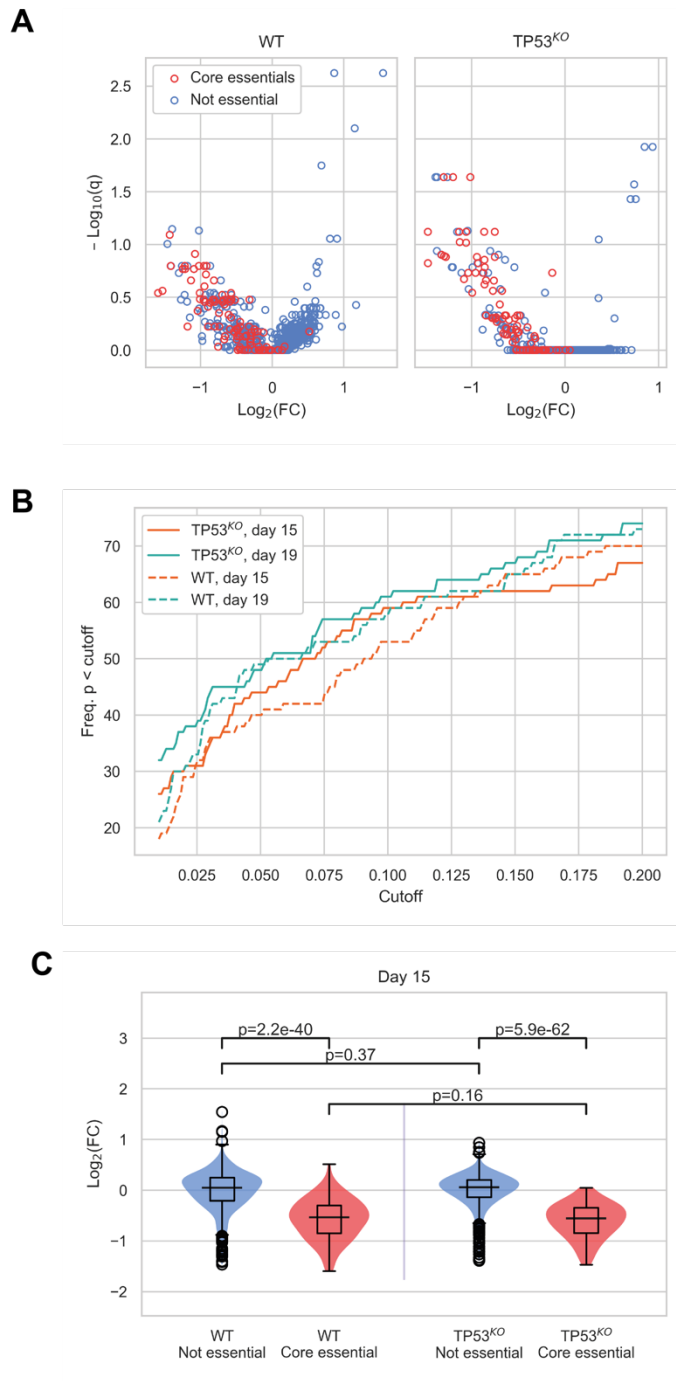

### Additional comparisons between wild-type and TP53<sup>KO</sup> CRISPR-Cas9 screens.

(A) Mean  $\log_2$  fold change (LFC) in guide abundance per gene, and significance of this change, from day 3 to day 15 of the experiment. q-values calculated using MAGeCK. (B) Number of core essential genes with p value less than the range of values given on the x-axis. (C) Mean LFC of guides targeting core essential and not core essential genes (Day 15 samples). Paired t-tests were used to test core essential or not essential genes between cell lines, unpaired t-tests were used within a cell line.

433  
434

### Supplementary Figure 3

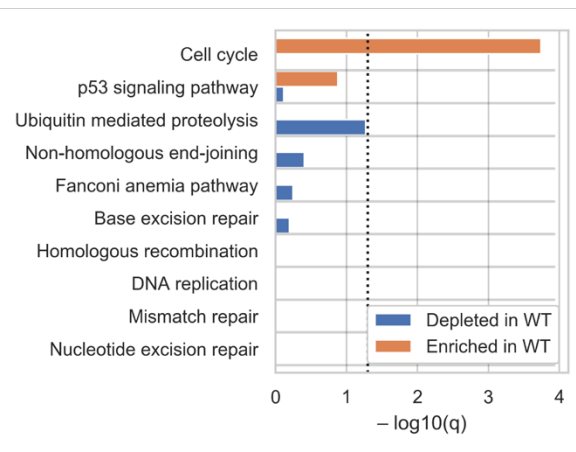

**Biological pathway analysis identifies cell cycle and p53 signalling as the pathways showing enrichment in the wild type (WT) compared to *TP53*<sup>KO</sup> screens.** Genes were categorised according to KEGG pathways and significance of enrichment and depletion values determined by Fisher's exact test.

435  
436

### Supplementary Figure 4

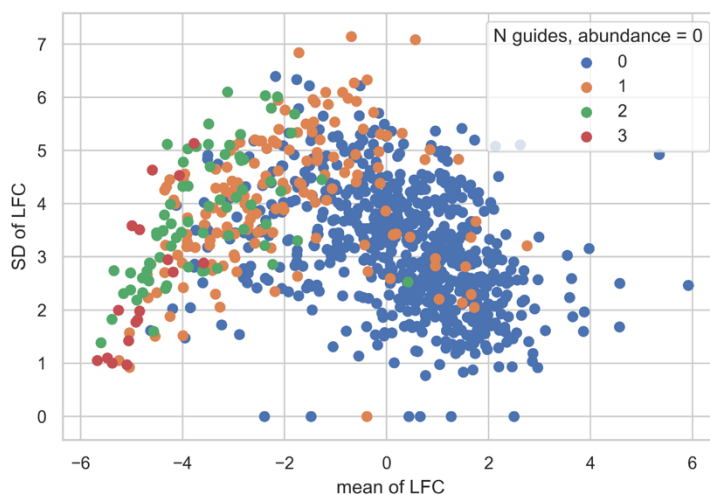

**Reduced variance at higher Log Fold Change is attributable to decreased sequencing reads across multiple guides.** Mean and standard deviation (SD) of LFC per gene in the MSKCC data are shown. Points are coloured by the number of guides targeting a gene that have abundance equal to zero in both replicates.

437  
438

## Supplementary Figure 5

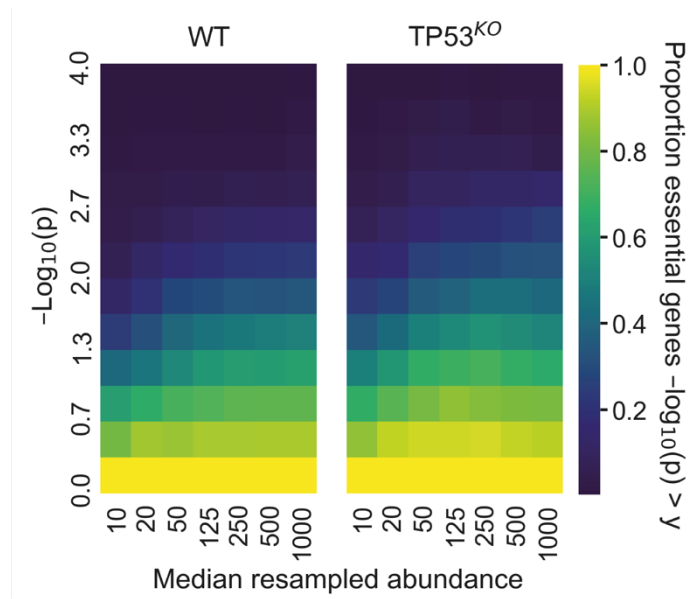

**The effect on detection of core essential genes at different sequencing read depths in our screen, shown by resampling read abundances to different levels and analysing with MAGeCK.**

Cumulative proportion of core essential genes with depletion  $-\log_{10}(p)$  greater than values given on the y axis. The mean proportions across 5 replicate resamplings are given.

439  
440  
441
